# Supplementary material for: Open fires in Greenland in summer 2017: transport, deposition and radiative effects of BC, OC and BrC emissions
Source: Copernicus journal article supplement (doi:10.5194/acp-19-1393-2019), 2019-02-01
Supplement: Supplementary file 1 [file acp-19-1393-2019-supplement.zip]

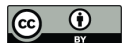

*Supplement of*

## **Open fires in Greenland in summer 2017: transport, deposition and radiative effects of BC, OC and BrC emissions**

**Nikolaos Evangeliou et al.**

*Correspondence to:* Nikolaos Evangeliou ([nikolaos.evangeliou@nilu.no](mailto:nikolaos.evangeliou@nilu.no))

- [acp-19-1393-2019-supplement-title-page.pdf](#)
- [03.Supplements.pdf](#)
- [Anim\\_Depo\\_Greenland17.gif](#)
- [Anim\\_TotCon\\_Greenland17.gif](#)

The copyright of individual parts of the supplement might differ from the CC BY 4.0 License.
